# Supplementary material for: Effect of particle size on magnetic and electric transport properties of La0.67Sr0.33MnO3 coatings
Source: Royal Society of Chemistry journal article supplement (doi:10.1039/c5cp04477d), 2015-01-01
Supplement: c5cp04477d1.pdf [file c5cp04477d1.pdf]

## Electronic Supplementary Information

### Effect of particle size on electromagnetic transport properties of $\text{La}_{0.67}\text{Sr}_{0.33}\text{MnO}_3$ coatings

Yu Zhou, Xinde Zhu, Shengli Li\*

*School of Materials Science and Engineering, Shandong University, Shandong Ji'nan,  
250061, P. R. China*

Corresponding Author\*.

E-mail: [lishengli@sdu.edu.cn](mailto:lishengli@sdu.edu.cn). Tel.: +86 531 88395620. Fax: +86 531 88392313.

Fig. S1. The EDS images of elemental analysis of sample LSMO-12.

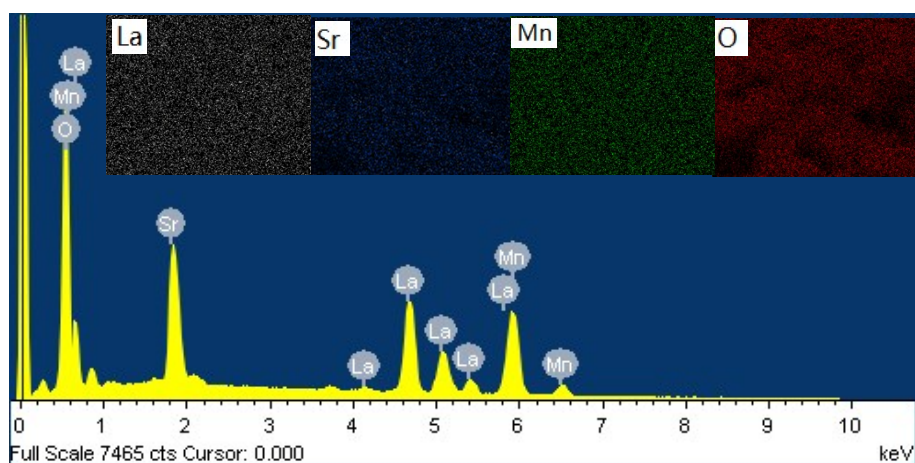

Processing option : All elements analyzed (Normalised)

Number of iterations = 4

Standard :

|    |                  |                     |
|----|------------------|---------------------|
| O  | SiO <sub>2</sub> | 1-Jun-1999 12:00 AM |
| Mn | Mn               | 1-Jun-1999 12:00 AM |
| Sr | SrF <sub>2</sub> | 1-Jun-1999 12:00 AM |
| La | LaB <sub>6</sub> | 1-Jun-1999 12:00 AM |

| Element | Weight% | Atomic% |
|---------|---------|---------|
| O K     | 22.05   | 60.78   |
| Mn K    | 24.42   | 19.61   |
| Sr L    | 14.02   | 7.06    |
| La L    | 39.51   | 12.55   |
| Totals  | 100.00  |         |

Table S1. The fitting parameters obtained from resistivity data of low temperature region ( $5 \text{ K} < T < 50 \text{ K}$ ) both in the presence and absence of a magnetic field according to the ISPT model.

| Samples | $r_1 (\Omega\text{cm})$ |                       | $r_2 (\Omega\text{cm K}^{-3/2})$ |                       | $\epsilon$            |                       | $ J /k_B (\text{K})$ |       | $R^2$  |        |
|---------|-------------------------|-----------------------|----------------------------------|-----------------------|-----------------------|-----------------------|----------------------|-------|--------|--------|
|         | B=0 T                   | B=1 T                 | B=0 T                            | B=1 T                 | B=0 T                 | B=1 T                 | B=0 T                | B=1 T | B=0 T  | B=1 T  |
| LSMO-9  | $2.99 \times 10^2$      | $4.12 \times 10^2$    | $1.25 \times 10^{-3}$            | $6.66 \times 10^{-4}$ | $7.04 \times 10^{-1}$ | 5.43                  | $1.05 \times 10^2$   | 9.32  | 0.9980 | 0.9905 |
| LSMO-10 | $1.06 \times 10^1$      | 9.27                  | $4.23 \times 10^{-6}$            | $5.38 \times 10^{-6}$ | $3.22 \times 10^{-1}$ | $6.55 \times 10^{-1}$ | $2.03 \times 10^1$   | 7.26  | 0.9993 | 0.9982 |
| LSMO-11 | $8.91 \times 10^{-1}$   | $7.10 \times 10^{-1}$ | $6.89 \times 10^{-7}$            | $9.34 \times 10^{-7}$ | $6.06 \times 10^{-2}$ | $1.70 \times 10^{-1}$ | $1.76 \times 10^1$   | 2.78  | 0.9729 | 0.9886 |
| LSMO-12 | $1.11 \times 10^{-1}$   | $1.05 \times 10^{-1}$ | $1.20 \times 10^{-7}$            | $8.10 \times 10^{-8}$ | $4.02 \times 10^{-2}$ | $7.22 \times 10^{-2}$ | $1.36 \times 10^1$   | 2.65  | 0.9974 | 0.9947 |

Table S2. The fitting parameters obtained from resistivity data of ferromagnetic metallic region ( $50 \text{ K} < T < T_p$ ) both in the presence and absence of a magnetic field.

| Samples | $\rho_0 (\Omega\text{cm})$ |                       | $\rho_2 (\Omega\text{cm K}^{-2})$ |                       | $\rho_{4.5} (\Omega\text{cm K}^{-4.5})$ |                         | $R^2$  |        |
|---------|----------------------------|-----------------------|-----------------------------------|-----------------------|-----------------------------------------|-------------------------|--------|--------|
|         | B=0 T                      | B=1 T                 | B=0 T                             | B=1 T                 | B=0 T                                   | B=1 T                   | B=0 T  | B=1 T  |
| LSMO-9  | $5.13 \times 10^2$         | $4.46 \times 10^2$    | $4.72 \times 10^{-2}$             | $4.42 \times 10^{-2}$ | $-1.00 \times 10^{-7}$                  | $-8.87 \times 10^{-8}$  | 0.9975 | 0.9970 |
| LSMO-10 | 9.50                       | 8.03                  | $6.10 \times 10^{-4}$             | $6.19 \times 10^{-4}$ | $-4.78 \times 10^{-10}$                 | $-4.79 \times 10^{-10}$ | 0.9988 | 0.9993 |
| LSMO-11 | $8.42 \times 10^{-1}$      | $6.76 \times 10^{-1}$ | $2.72 \times 10^{-5}$             | $2.92 \times 10^{-5}$ | $-4.53 \times 10^{-12}$                 | $-6.01 \times 10^{-12}$ | 0.9961 | 0.9978 |
| LSMO-12 | $1.05 \times 10^{-2}$      | $8.61 \times 10^{-3}$ | $4.91 \times 10^{-6}$             | $4.91 \times 10^{-6}$ | $-1.41 \times 10^{-12}$                 | $-1.66 \times 10^{-12}$ | 0.9998 | 0.9989 |

Table S3. The fitting parameters obtained from resistivity data of paramagnetic insulating region ( $T_p < T < 300 \text{ K}$ ) both in the presence and absence of a magnetic field.

| Samples | $T_0 (\text{K})$   |                    | $N (E_F) (\text{eV}^{-1} \text{cm}^{-3})$ |                       | $R^2$  |        |
|---------|--------------------|--------------------|-------------------------------------------|-----------------------|--------|--------|
|         | B=0 T              | B=1 T              | B=0 T                                     | B=1 T                 | B=0 T  | B=1 T  |
| LSMO-9  | $2.31 \times 10^6$ | $1.85 \times 10^6$ | $0.88 \times 10^{21}$                     | $1.09 \times 10^{21}$ | 0.9975 | 0.9993 |
| LSMO-10 | $5.68 \times 10^4$ | $5.42 \times 10^4$ | $3.57 \times 10^{22}$                     | $3.74 \times 10^{22}$ | 0.9988 | 0.9940 |
| LSMO-11 | $6.70 \times 10^2$ | $6.27 \times 10^2$ | $3.03 \times 10^{24}$                     | $3.24 \times 10^{24}$ | 0.9961 | 0.9960 |
